# Supplementary material for: High-performance flexible piezoresistive pressure sensor based on multi-layer interlocking microstructures
Source: Royal Society of Chemistry journal article supplement (doi:10.1039/d4ta03758h), 2024-01-01
Supplement: d4ta03758h1.pdf [file d4ta03758h1.pdf]

# Supplementary Material

## High-performance Flexible Piezoresistive Pressure Sensor Based on Multi-layer Interlocking Microstructures

*Meng Wang*<sup>1\*</sup>, *Gongdong Wang*<sup>1,2\*</sup>, *Mingyang Zheng*<sup>1</sup>, *Lei Liu*<sup>1</sup>, *Chengyang Xu*<sup>1</sup>,  
*Zhendong Liu*<sup>1</sup>, *Long He*<sup>2</sup>

<sup>1</sup> School of Aerospace Engineering, Shenyang Aerospace University, Shenyang 110136, China

<sup>2</sup> Zhiyuan Research Institute, Hangzhou 310012, China

\*Correspondence to: [wm18842473310@163.com](mailto:wm18842473310@163.com)

\*Correspondence to: [cadcam119@126.com](mailto:cadcam119@126.com)

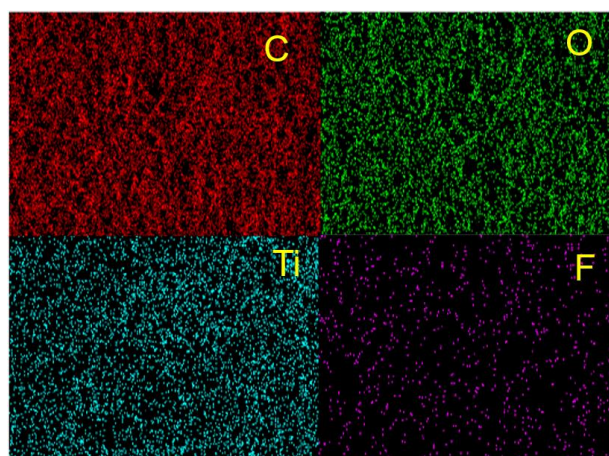

**Fig. S1.** The EDS elemental mapping of the TPU/MXene fiber membrane.

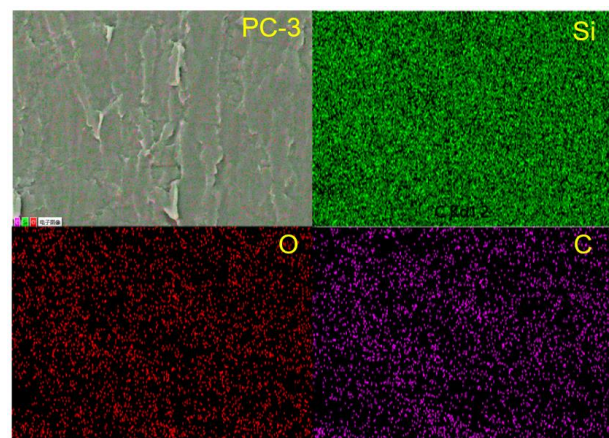

**Fig. S2.** The EDS elemental mapping images of C, Si, and O obtained from PC-3.

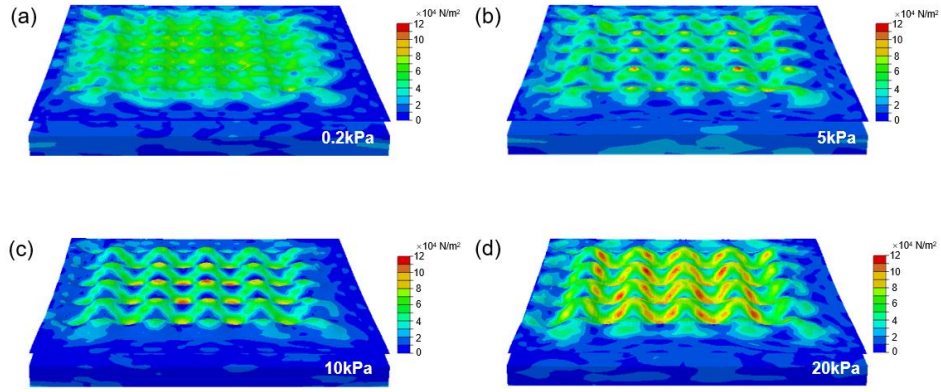

**Fig. S3.** The stress-strain distribution of the TPU/MXene fibre film at different pressures: (a) 0.2 kPa, (b) 5 kPa, (c) 10 kPa, (d) 20 kPa.

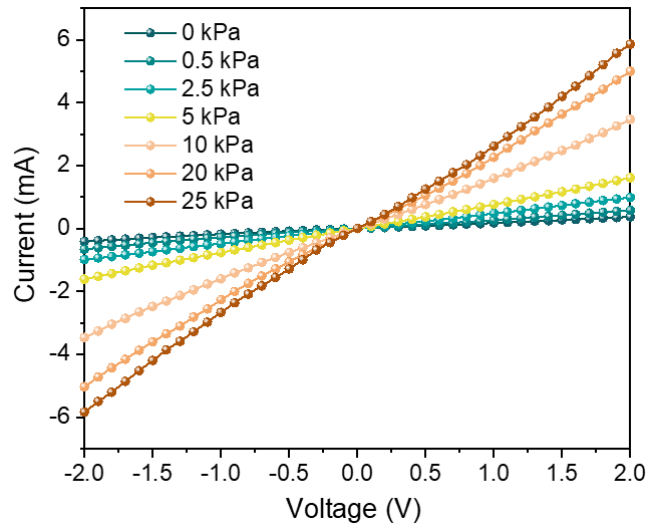

**Fig. S4.** The I-V characteristic curves of the PC3-TM1 pressure sensor at different pressures.

**Table S5** A summary of the properties of recently published pressure sensors.

| Ref.             | Materials                 | Structure                                      | Sensing range (kPa) | Highest $S$ ( $\text{kPa}^{-1}$ ) |
|------------------|---------------------------|------------------------------------------------|---------------------|-----------------------------------|
| <b>This work</b> | <b>PDMS/CNT-TPU/MXene</b> | <b>microdome array and electrospun fibrous</b> | <b>25</b>           | <b>82.17(&lt;0.2 kPa)</b>         |
| 1[57]            | TPU/c-MWCNTs              | electrospun fibrous network                    | 10                  | 2(<0.2 kPa)                       |
| 2[58]            | PAN carbonisation         | 3D nanofiber networks                          | 2.5                 | 1.41(<0.25 kPa)                   |
| 3[59]            | CNF/PDMS                  | electrospun fibrous                            | 2                   | 0.96(<0.5 kPa)                    |
| 4[36]            | MXene/PEDOT:PSS           | porous aerogel                                 | 11                  | 26.65(<2 kPa)                     |
| 5[12]            | GO/MXene/silk fibroin     | 3D foam                                        | 1.4                 | 14.23                             |

|              |             |                                               |     |                  |
|--------------|-------------|-----------------------------------------------|-----|------------------|
| <b>6[60]</b> | CNT/PDMS    | hybrid porous microstructures                 | 10  | 83.9(<0.14 kPa)  |
| <b>7[50]</b> | PU/AgNW     | microdome array                               | 10  | 6.258(<0.04 kPa) |
| <b>8[61]</b> | MXene@PDMS  | micro protrusion structure from the sandpaper | 30  | 2.6              |
| <b>9[62]</b> | CNT/CB/PDMS | bioinspired spinosum microstructure film      | 7.5 | 32.9(<0.05 kPa)  |
